# Supplementary material for: MicroRNA‐based biomarkers for diagnosis of non‐small cell lung cancer (NSCLC)
Source: PubMed Central journal article supplement — Thorac Cancer. 2020 Jan 28;11(3):762–8. doi: 10.1111/1759-7714.13337 (PMC7049510; doi:10.1111/1759-7714.13337), 2020-01-28
Supplement: TCA-11-762-s001.pdf [file TCA-11-762-s001.pdf]

**Supplementary Table 1.** Expression levels of the sputum miRNAs and plasma miRNAs in NSCLC patients versus cancer-free controls of the training cohort

|                   | Mean (SEM) of miRNA level<br>in NSCLC patients | Mean (SEM) of miRNA level<br>in controls | P-value |
|-------------------|------------------------------------------------|------------------------------------------|---------|
| Sputum miR-21-5p  | 59.23 (5.48)                                   | 7.39 (1.26)                              | < 0.001 |
| Sputum miR-210-3p | 69.26 (6.12)                                   | 6.08 (0.45)                              | < 0.001 |
| Plasma miR-21-5p  | 23.27 (5.53)                                   | 8.12 (3.39)                              | < 0.001 |
| Plasma miR-210-3p | 12.49 (3.73)                                   | 4.49 (1.27)                              | < 0.001 |
| Plasma miR-486-5p | 122.65 (29.67)                                 | 78.36 (10.05)                            | < 0.001 |

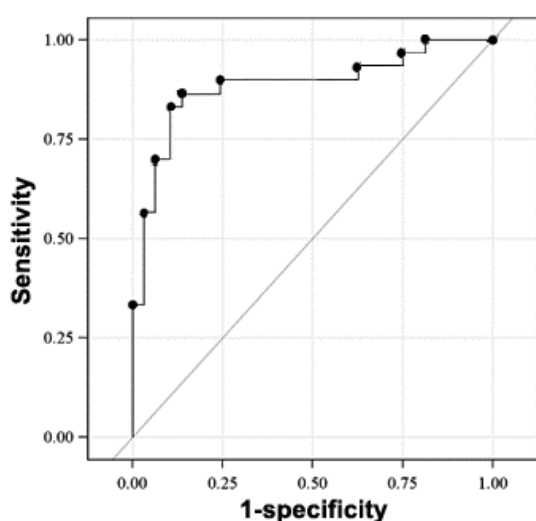

**Supplementary Fig.1.**

The receiver-operator characteristic (ROC) curve of sputum and plasma miRNA biomarkers for lung cancer diagnosis. Two sputum miRNAs (miRs-21-5p and 210-3p) and one plasma miRNA (miRNA-31-5p) were selected as the best ones and incorporated into an algorithm:  $P = \frac{e^x}{1 + e^x}$ , where  $x = 6.62 + 1.84 \times \log(\text{miR-21-5p}) - 2.6 \times \log(\text{miR-21-3p}) - 2.36 \times \log(\text{miR-31-5p})$ . The algorithm produced the area under the ROC (AUC) of 0.91 for distinguishing lung cancer cases from controls.
